CORRECTION

# Correction: Extracellular Acidification Acts as a Key Modulator of Neutrophil Apoptosis and Functions

Shannan Cao, Peng Liu, Haiyan Zhu, Haiyan Gong, Jianfeng Yao, Yawei Sun, Guangfeng Geng, Tong Wang, Sizhou Feng, Mingzhe Han, Jiayi Zhou, Yuanfu Xu

The Funding section is incorrect. The correct funding information is as follows: This study was supported by grants from the National Basic Research Program of China (2012CB966403 and 2015CB964903), the Chinese National Natural Science Foundation (31271484, 31471116, and 31171431), and the Tianjin Natural Science Foundation (12JCZDJC24600).

## Reference

1. Cao S, Liu P, Zhu H, Gong H, Yao J, Sun Y, et al. (2015) Extracellular Acidification Acts as a Key Modulator of Neutrophil Apoptosis and Functions. PLoS ONE 10(9): e0137221. doi: [10.1371/journal.pone.0137221](https://doi.org/10.1371/journal.pone.0137221) PMID: [26340269](https://pubmed.ncbi.nlm.nih.gov/26340269/)

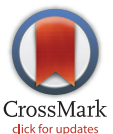

## OPEN ACCESS

**Citation:** Cao S, Liu P, Zhu H, Gong H, Yao J, Sun Y, et al. (2015) Correction: Extracellular Acidification Acts as a Key Modulator of Neutrophil Apoptosis and Functions. PLoS ONE 10(9): e0139500. doi:10.1371/journal.pone.0139500

**Published:** September 25, 2015

**Copyright:** © 2015 Cao et al. This is an open access article distributed under the terms of the [Creative Commons Attribution License](https://creativecommons.org/licenses/by/4.0/), which permits unrestricted use, distribution, and reproduction in any medium, provided the original author and source are credited.
